# Supplementary material
Source: PubMed Central journal article supplement (PMC5710350)
Supplement: jamaotolaryngolheadnecksurg-143-1111-s001.pdf [file jamaotolaryngolheadnecksurg-143-1111-s001.pdf]

## Supplementary Online Content

Schoppy DW, Rhoads KF, Ma Y, et al. Measuring institutional quality in head and neck surgery using hospital-level data—negative margin rates and neck dissection yield [published online October 5, 2017]. *JAMA Otolaryngol Head Neck Surg*. doi:10.1001/jamaoto.2017.1694

**eTable 1.** Descriptive characteristics of 1,008 hospitals in the final dataset

**eFigure.** CONSORT diagram illustrating patient/hospital inclusion and exclusion criteria

This supplementary material has been provided by the authors to give readers additional information about their work.

**Supplemental Table 1: Descriptive characteristics of 1,008 hospitals in the final dataset**  
*(Head and neck cancers, National Cancer Database, 2004 to 2013)*

| <b>Hospital Characteristic</b> | <b>Overall<br/>(n=1,008)</b> | <b>Hospitals not<br/>meeting thresholds<br/>(n=976)</b> | <b>Neg Margin Rate &gt;<br/>90%<br/>LNY ≥ 18 &gt; 80%<br/>(n=32)</b> |
|--------------------------------|------------------------------|---------------------------------------------------------|----------------------------------------------------------------------|
| Avg negative margin rate       | 79.3%                        | 77.7%                                                   | 92.8%                                                                |
| Avg rate of LNY ≥ 18           | 71.1%                        | 69.4%                                                   | 85.7%                                                                |
| Avg hospital vol (per yr)      | 32.9                         | 25.1                                                    | 97.5                                                                 |
| % with top quartile vol        | 25.0%                        | 24.1%                                                   | 37.5%                                                                |
| % academic teaching            | 18.9%                        | 18.7%                                                   | 25.6%                                                                |
| <b>Payer Mix</b>               |                              |                                                         |                                                                      |
| % Medicare/Medicaid            | 47.4%                        | 47.5%                                                   | 47.1%                                                                |
| % No insurance                 | 5.3%                         | 5.6%                                                    | 2.7%                                                                 |
| % private                      | 44.2%                        | 43.8%                                                   | 47.1%                                                                |
| <b>Patient Mix</b>             |                              |                                                         |                                                                      |
| % Income top quartile          | 37.2%                        | 37.0%                                                   | 39.4%                                                                |
| % Education top quartile       | 33.0%                        | 32.5%                                                   | 37.1%                                                                |

*(LNY – lymph node yield, neg – negative, avg – average, vol - volume)*

**Supplemental Figure 1.** CONSORT diagram illustrating patient/hospital inclusion and exclusion criteria.

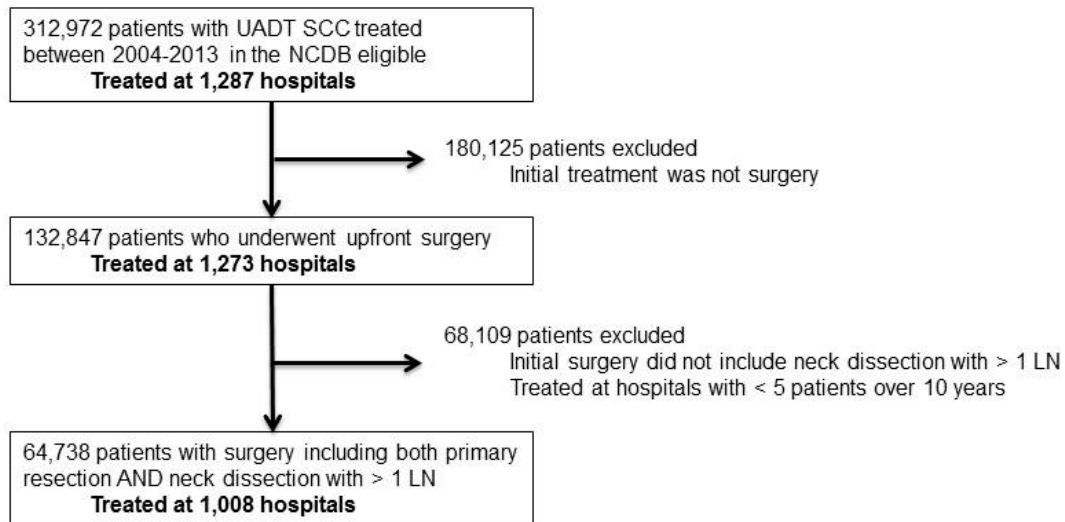

\*UADT – upper aerodigestive tract, SCC- squamous cell carcinoma, NCDB – National Cancer Database, LN – lymph node
